# Supplementary material for: A comprehensive investigation of Sr segregation effects on the high-temperature oxygen evolution reaction rate
Source: Royal Society of Chemistry journal article supplement (doi:10.1039/d4ee05056h), 2025-01-01
Supplement: d4ee05056h1.pdf [file d4ee05056h1.pdf]

## Supporting Information

### **A comprehensive investigation of Sr segregation effects on the high-temperature oxygen evolution reaction rate**

Weicheng Feng,<sup>‡ab</sup> Geng Zou,<sup>‡ab</sup> Tianfu Liu,<sup>‡ab</sup> Rongtan Li,<sup>‡ab</sup> Jingcheng Yu,<sup>ab</sup> Yige Guo,<sup>ab</sup> Qingxue Liu,<sup>ab</sup> Xiaomin Zhang,<sup>a</sup> Junhu Wang,<sup>ac</sup> Na Ta,<sup>a</sup> Mingrun Li,<sup>a</sup> Peng Zhang,<sup>d</sup> Xingzhong Cao,<sup>d</sup> Runsheng Yu,<sup>d</sup> Yuefeng Song,<sup>\*ac</sup> Meilin Liu,<sup>\*c</sup> Guoxiong Wang,<sup>\*af</sup> and Xinhe Bao<sup>a</sup>

<sup>a</sup>*State Key Laboratory of Catalysis, Dalian National Laboratory for Clean Energy, iChEM (Collaborative Innovation Center of Chemistry for Energy Materials), Dalian Institute of Chemical Physics, Chinese Academy of Sciences, Dalian 116023, China.*

<sup>b</sup>*College of Energy, University of Chinese Academy of Sciences, Beijing 100049, China  
Center for Advanced Mössbauer Spectroscopy, Dalian Institute of Chemical Physics,*

<sup>c</sup>*Chinese Academy of Sciences, Dalian 116023, Liaoning, China*

<sup>d</sup>*Multi-disciplinary Research Division, Institute of High Energy Physics, Chinese Academy of Sciences, Beijing, 100049, P. R. China*

<sup>e</sup>*School of Materials Science and Engineering, Georgia Institute of Technology, Atlanta 30332, USA*

<sup>f</sup>*Department of Chemistry, Shanghai Key Laboratory of Molecular Catalysis and Innovative Materials, iChEM (Collaborative Innovation Center of Chemistry for Energy Materials), Fudan University, Shanghai 200438, China*

<sup>‡</sup> These authors contributed equally to this work

\*E-mail: songyf2014@dicp.ac.cn, meilin.liu@mse.gatech.edu, wanggx@dicp.ac.cn

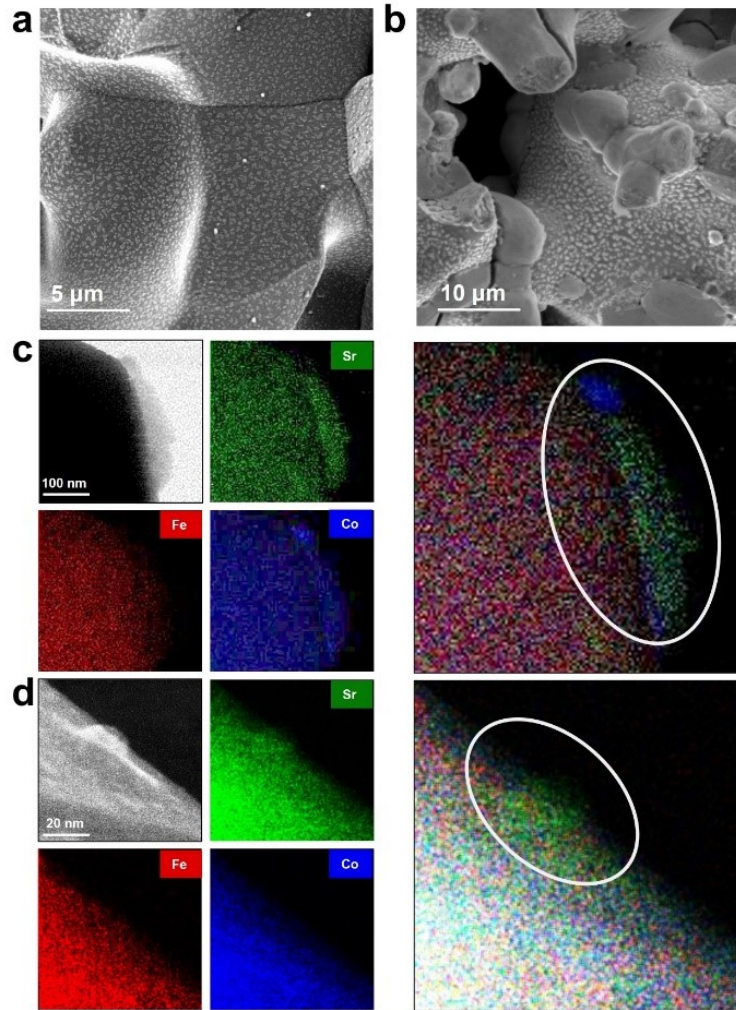

**Fig. S1** | (a) SEM images, and (c) EDS elemental maps of SCF-SDC anode after O<sub>2</sub> treatment at 800 °C for 3 h, and (b) SEM images, and (d) EDS elemental maps of SCF-SDC anode after stability test for 487 h.

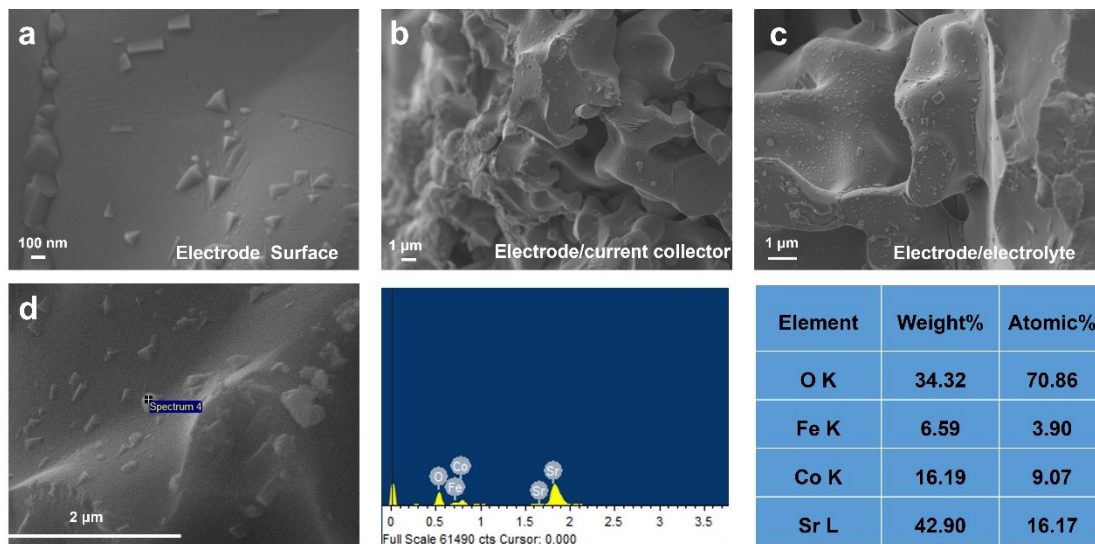

**Fig. S2** | SEM images SCF anode after treatment for 1 h at pure O<sub>2</sub> atmosphere. **(a)** SCF anode surface, **(b)** electrode/current collector interface, **(c)** electrode/electrolyte interface, **(d)** EDX of Sr aggregation at the boundaries.

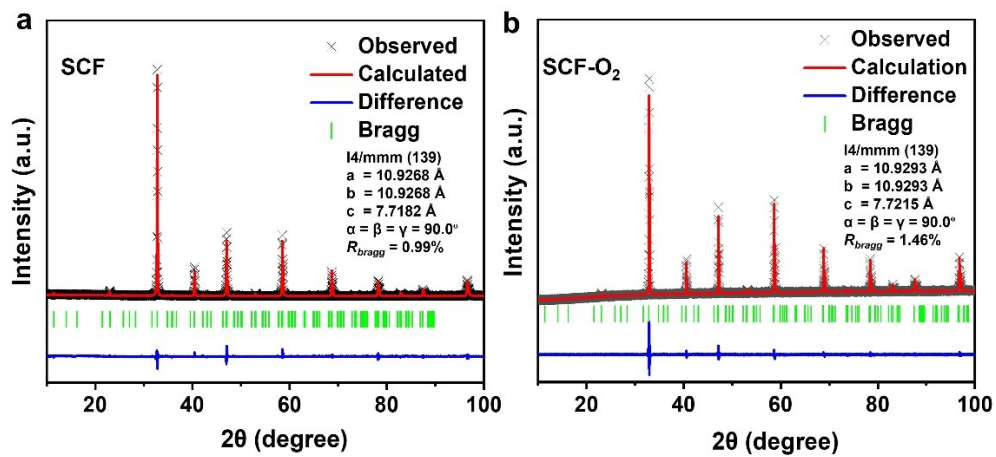

Fig. S3 | Rietveld refinement results of the XRD patterns for (a) SCF and (b) SCF-O<sub>2</sub>.

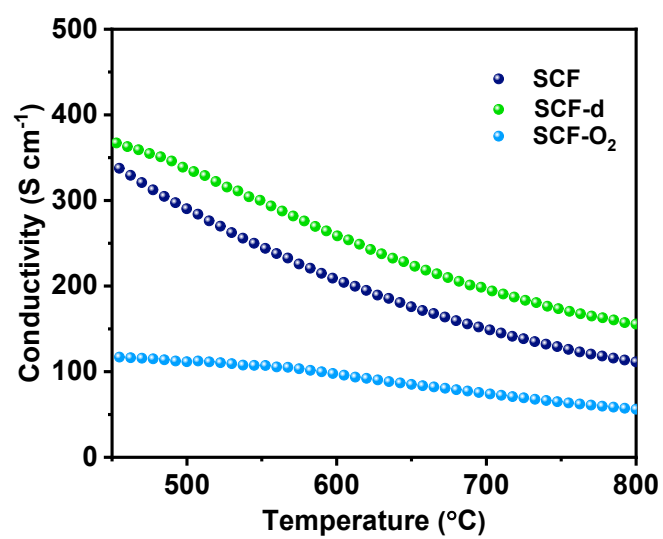

**Fig. S4** | Electrical conductivity curves of SCF, SCF-d and SCF-O<sub>2</sub> at different temperatures in air.

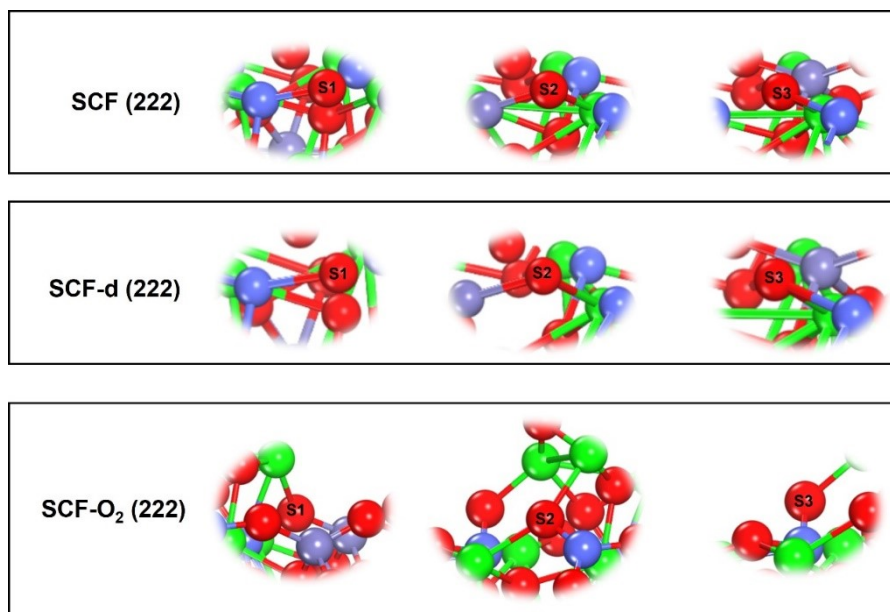

**Fig. S5** | The different surface or interface oxygen vacancy sites.

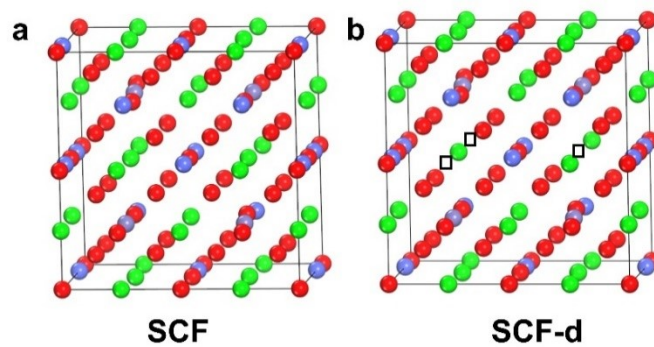

**Fig. S6** | Models used for the DFT calculation. **(a)** SCF and **(b)** SCF-d for the calculation of  $E_{vfb}$ . Color code: O (red ball), Sr (green ball), Co (dark blue ball), Fe (light blue ball), respectively.

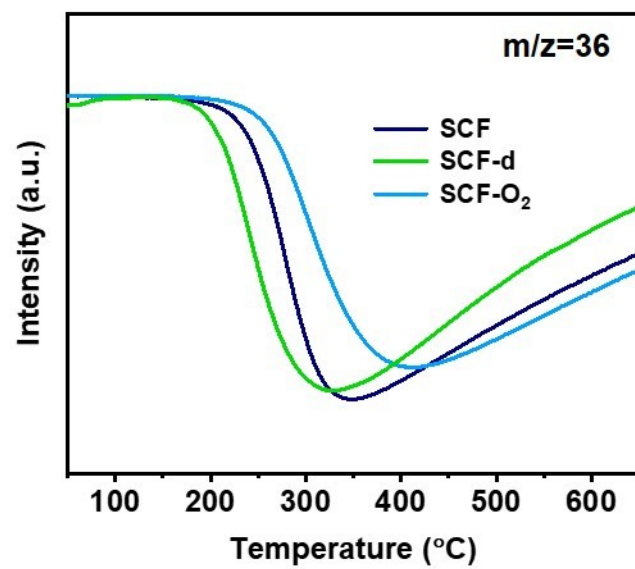

**Fig. S7** | <sup>18</sup>O<sub>2</sub> isotope exchange profiles of different samples.



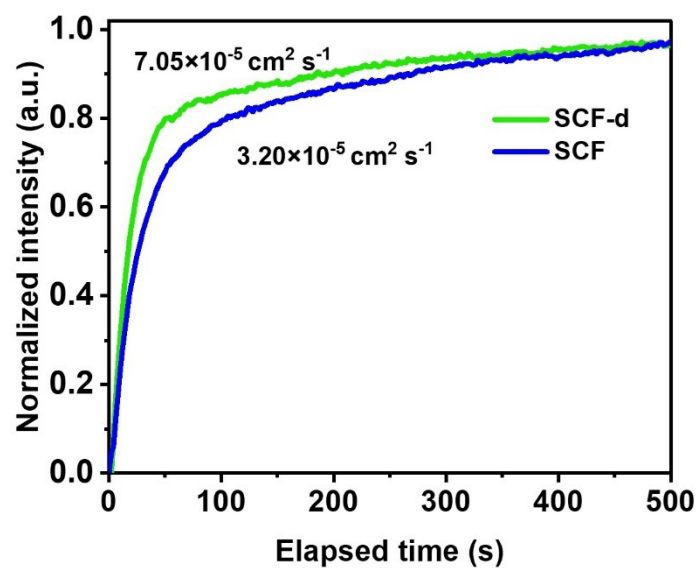

Fig. S8 | ECR curves of SCF and SCF-d in air at 800 °C.

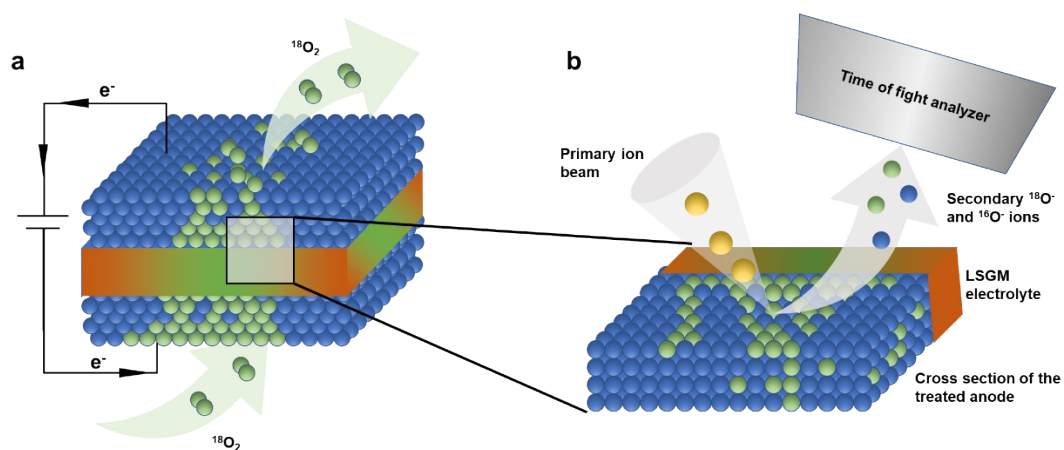

**Fig. S9** | Schematic diagram of *quasi in-situ* TOF-SIMS measurement. **(a)** The pre-treatment of SOEC with different anode by  $^{18}\text{O}_2$  gas, and the grey box is the test area for elemental mapping of TOF-SIMS. **(b)** Schematic diagram of TOF-SIMS measurement. Color code:  $^{18}\text{O}$  (green balls),  $^{16}\text{O}$  (blue balls), and Bi (yellow balls).

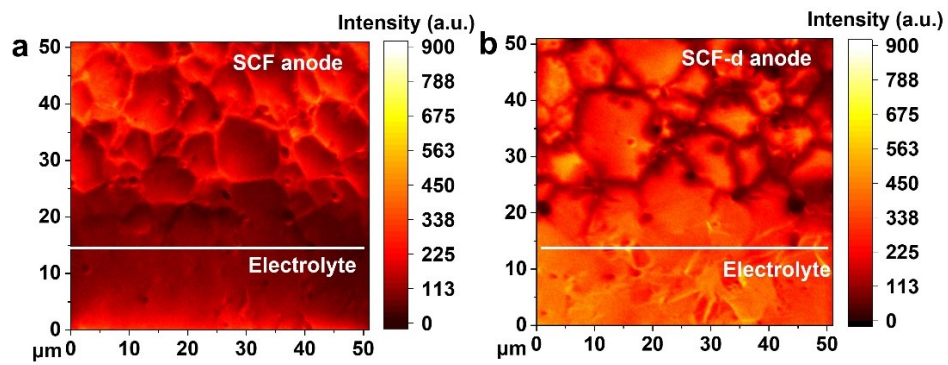

**Fig. S10** | Two-dimensional spectra of TOF-SIMS for different samples. Total  $O^-$  signal intensity distribution of (a) SCF and (b) SCF-d.

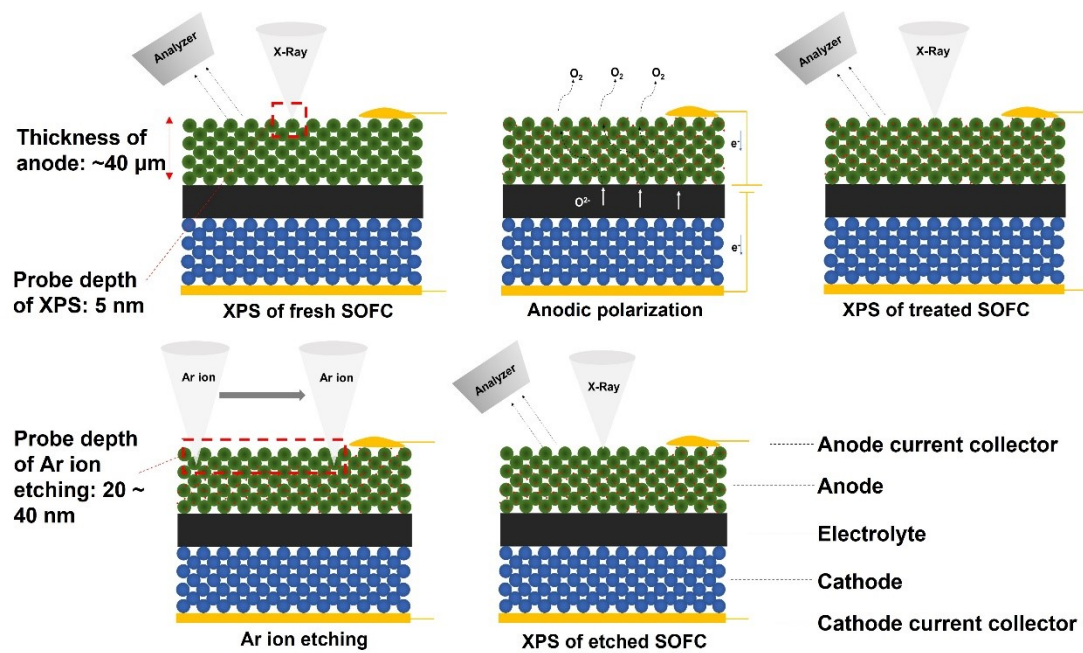

**Fig. S11** | Schematic diagram of Ar ion etching and XPS measurements.

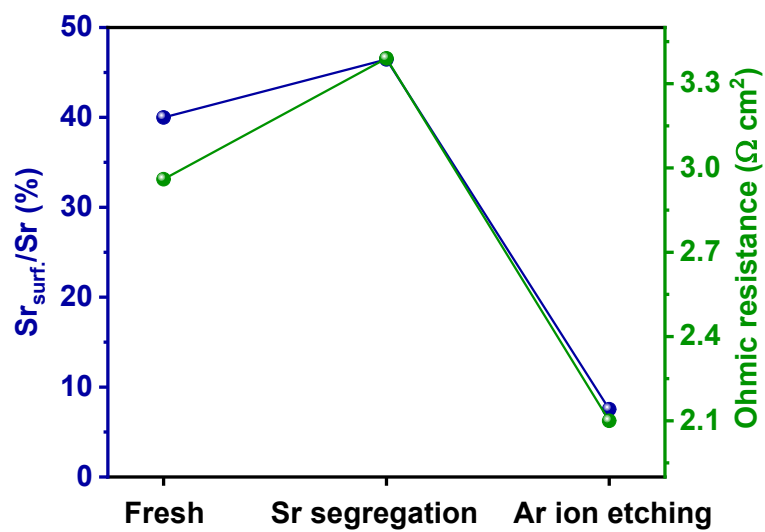

**Fig. S12** | Variation of ohmic resistance at OCV and the amount of surface Sr species of SCF electrode under different conditions.

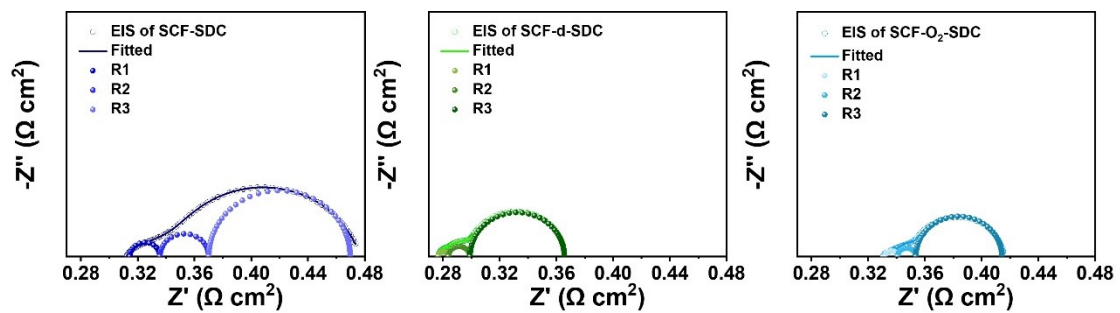

**Fig. S13** | The CNLS fitting results of EIS of SOECs with different anodes.

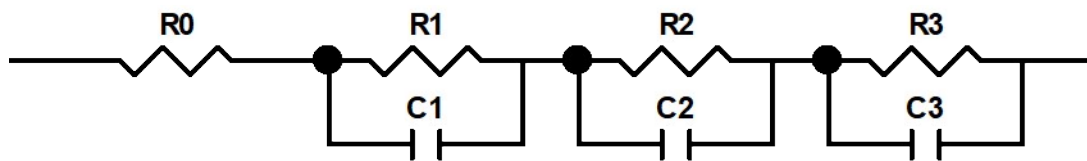

**Fig. S14** | Equivalent circuit for the CNLS fitting of EIS curves.

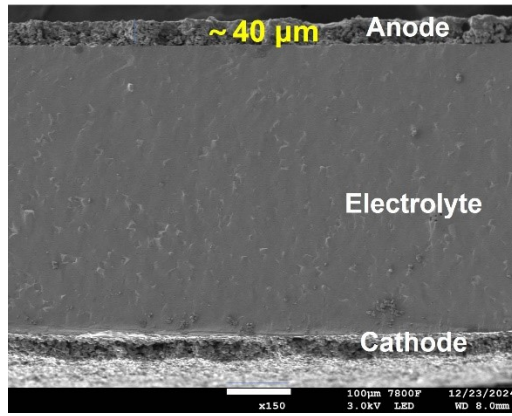

**Fig. S15** The SEM image of the SOEC.



**Table S1** | Fitting results of Sr 3*d* XPS spectra of SCF and SCF-d.

| Sample             | Binding energy (eV)    |                        |                        |                        | Sr <sub>sur.</sub> /Sr (%) |
|--------------------|------------------------|------------------------|------------------------|------------------------|----------------------------|
|                    | Sr <sup>3+</sup> (3/2) | Sr <sup>4+</sup> (3/2) | Sr <sup>3+</sup> (1/2) | Sr <sup>4+</sup> (1/2) |                            |
| SCF                | 132.82                 | 134.13                 | 134.60                 | 135.93                 | 39.99                      |
| SCF-O <sub>2</sub> | 131.12                 | 132.76                 | 133.30                 | 134.77                 | 60.60                      |

**Table S2** | Positron annihilation lifetime measurement results for SCF and SCF-O<sub>2</sub>.

| Sample             | C <sub>1</sub> |                    | C <sub>2</sub> |                    | C <sub>3</sub> |                    |
|--------------------|----------------|--------------------|----------------|--------------------|----------------|--------------------|
|                    | $\tau_1$ (ps)  | I <sub>1</sub> (%) | $\tau_2$ (ps)  | I <sub>2</sub> (%) | $\tau_3$ (ps)  | I <sub>3</sub> (%) |
| SCF                | 102.1          | 21.2               | 199.5          | 78.0               | 1384           | 0.856              |
| SCF-O <sub>2</sub> | 112.8          | 37.9               | 207.1          | 61.2               | 1527           | 0.91               |

**Table S3** | Rietveld refinement parameters of SCF sample.

| <b>Atom</b> | <b>Wyck.</b> | <b>s.o.f.</b> | <b>x</b> | <b>y</b> | <b>z</b> |
|-------------|--------------|---------------|----------|----------|----------|
| O1          | 16m          | 0.909569      | 0.119014 | 0.119014 | 0.277600 |
| O2          | 16k          | 0.894607      | 0.124127 | 0.624127 | 0.250000 |
| Sr1         | 8j           | 1.000000      | 0.242032 | 0.500000 | 0.000000 |
| Sr2         | 8i           | 1.000000      | 0.254532 | 0.000000 | 0.000000 |
| O3          | 8h           | 1.000000      | 0.237501 | 0.237501 | 0.000000 |
| Fe1         | 8f           | 0.300000      | 0.250000 | 0.250000 | 0.250000 |
| Fe2         | 4e           | 0.300000      | 0.000000 | 0.000000 | 0.250000 |
| Fe3         | 4d           | 0.300000      | 0.000000 | 0.500000 | 0.250000 |
| O4          | 4c           | 1.000000      | 0.000000 | 0.500000 | 0.000000 |
| O5          | 2a           | 1.000000      | 0.000000 | 0.000000 | 0.000000 |
| Co1         | 8f           | 0.700000      | 0.250000 | 0.250000 | 0.250000 |
| Co2         | 4e           | 0.700000      | 0.000000 | 0.000000 | 0.250000 |
| Co3         | 4d           | 0.700000      | 0.000000 | 0.500000 | 0.250000 |

**Table S4** | Rietveld refinement parameters of SCF-O<sub>2</sub> sample.

| <b>Atom</b> | <b>Wyck.</b> | <b>s.o.f.</b> | <b>x</b> | <b>y</b> | <b>z</b> |
|-------------|--------------|---------------|----------|----------|----------|
| O1          | 2a           | 0.494631      | 0.000000 | 0.000000 | 0.277600 |
| O2          | 16m          | 0.609941      | 0.119000 | 0.119000 | 0.000000 |
| Sr1         | 8j           | 1.000000      | 0.242300 | 0.500000 | 0.000000 |
| Sr2         | 8i           | 1.000000      | 0.251000 | 0.000000 | 0.000000 |
| O3          | 8h           | 1.000000      | 0.234000 | 0.234000 | 0.000000 |
| Fe1         | 4e           | 0.300000      | 0.000000 | 0.000000 | 0.250000 |
| Fe2         | 8f           | 0.300000      | 0.250000 | 0.250000 | 0.250000 |
| Fe3         | 4d           | 0.300000      | 0.000000 | 0.500000 | 0.250000 |
| O4          | 16k          | 1.000000      | 0.123700 | 0.623700 | 0.250000 |
| O5          | 4c           | 1.000000      | 0.000000 | 0.500000 | 0.000000 |
| Co1         | 4e           | 0.700000      | 0.000000 | 0.000000 | 0.250000 |
| Co2         | 4e           | 0.700000      | 0.000000 | 0.000000 | 0.250000 |
| Co3         | 8f           | 0.700000      | 0.250000 | 0.250000 | 0.250000 |

**Table S5** | Fitting results of Fe 2*p* XPS spectra of SCF and SCF-d.

| Sample | Binding energy (eV)    |                        |                        |                        |           | Fe <sup>4+</sup> /Fe (%) |
|--------|------------------------|------------------------|------------------------|------------------------|-----------|--------------------------|
|        | Fe <sup>3+</sup> (3/2) | Fe <sup>4+</sup> (3/2) | Fe <sup>3+</sup> (1/2) | Fe <sup>4+</sup> (1/2) | Satellite |                          |
| SCF    | 709.45                 | 711.39                 | 722.79                 | 724.22                 | 714.67    | 46.17                    |
| SCF-d  | 709.47                 | 711.23                 | 722.78                 | 724.36                 | 714.88    | 52.50                    |

**Table S6** | Fitting results of Co 2*p* XPS spectra of SCF and SCF-d.

| Sample | Binding energy (eV)    |                        |                        |                        |           | Co <sup>4+</sup> /Co (%) |
|--------|------------------------|------------------------|------------------------|------------------------|-----------|--------------------------|
|        | Co <sup>3+</sup> (3/2) | Co <sup>4+</sup> (3/2) | Co <sup>3+</sup> (1/2) | Co <sup>4+</sup> (1/2) | Satellite |                          |
| SCF    | 781.01                 | 779.71                 | 796.44                 | 794.94                 | 784.71    | 43.65                    |
| SCF-d  | 781.18                 | 779.78                 | 796.68                 | 795.12                 | 784.73    | 47.66                    |

**Table S7** |  $^{57}\text{Fe}$ -Mössbauer parameters for SCF and SCF-d.

| <b>Sample</b> | <b>Sub-spectra</b> | <b>Fe species</b>       | <b>IS<br/>(mm s<sup>-1</sup>)</b> | <b>QS<br/>(mm s<sup>-1</sup>)</b> | <b>Content<br/>(%)</b> |
|---------------|--------------------|-------------------------|-----------------------------------|-----------------------------------|------------------------|
| SCF           | D1                 | Fe <sup>3+</sup> (CN=5) | 0.23(1)                           | 0.28(3)                           | 37.58                  |
|               | D2                 | Fe <sup>4+</sup> (CN=6) | -0.07(2)                          | 0.50(3)                           | 33.06                  |
|               | D3                 | Fe <sup>3+</sup> (CN=6) | 0.29(3)                           | 0.56(4)                           | 18.70                  |
|               | S1                 | Fe <sup>4+</sup> (CN=6) | -0.17(1)                          | -                                 | 10.66                  |
| SCF-d         | D1                 | Fe <sup>3+</sup> (CN=5) | 0.27(1)                           | 0.28(3)                           | 27.29                  |
|               | D2                 | Fe <sup>4+</sup> (CN=6) | -0.02(1)                          | 0.51(5)                           | 37.88                  |
|               | D3                 | Fe <sup>3+</sup> (CN=6) | 0.33(3)                           | 0.56(4)                           | 20.95                  |
|               | S1                 | Fe <sup>4+</sup> (CN=6) | -0.12(2)                          | -                                 | 13.88                  |

The reference used for the IS test is  $\alpha$ -Fe

**Table S8** |  $E_{vfs}$  of different sites in SCF, SCF-d and SCF-O<sub>2</sub>.

| <b>Sample</b>      | <b>Surface oxygen vacancy formation energy (eV)</b> |               |               |
|--------------------|-----------------------------------------------------|---------------|---------------|
|                    | <b>Site 1</b>                                       | <b>Site 2</b> | <b>Site 3</b> |
| SCF                | 0.90                                                | 2.19          | 0.40          |
| SCF-d              | 0.72                                                | 2.00          | 0.23          |
| SCF-O <sub>2</sub> | 2.08                                                | 3.21          | 0.48          |



**Table S9** |  $E_{vfb}$  of different sites in SCF and SCF-d.

| Sample | Bulk oxygen vacancy formation energy (eV) |        |        |        |
|--------|-------------------------------------------|--------|--------|--------|
|        | Site 1                                    | Site 2 | Site 3 | Site 4 |
| SCF    | 1.10                                      | 1.00   | 0.78   | 0.73   |
| SCF-d  | -0.12                                     | -0.12  | -0.66  | -0.33  |

**Table S10** | *In-situ* XPS analysis of O 1s spectra for SCF and SCF-d anodes under different conditions.

| Sample                    | Binding energy (eV) |        |                                 |                   | O <sub>ads.</sub> /O (%) |
|---------------------------|---------------------|--------|---------------------------------|-------------------|--------------------------|
|                           | H <sub>2</sub> O    | OH-    | O-/O <sub>2</sub> <sup>2-</sup> | O <sub>lat.</sub> |                          |
| SCF-SDC<br>RT, OCV        | 532.50              | 531.10 | 529.76                          | 528.41            | 61.69                    |
| SCF-SDC<br>1000 K, OCV    | 532.50              | 531.02 | 529.63                          | 528.40            | 26.01                    |
| SCF-SDC<br>1000 K, 1 mA   | 532.49              | 531.00 | 529.62                          | 528.41            | 32.06                    |
| SCF-d-SDC<br>RT, OCV      | 532.51              | 531.10 | 529.74                          | 528.46            | 63.50                    |
| SCF-d-SDC<br>1000 K, OCV  | 532.49              | 530.94 | 529.60                          | 528.39            | 25.29                    |
| SCF-d-SDC<br>1000 K, 1 mA | 532.57              | 531.00 | 529.59                          | 528.45            | 35.42                    |

**Table S11** | Resistance of each electrode process for SOECs with different anodes.

| <b>Sample</b>           | <b>R1 (<math>\Omega \text{ cm}^2</math>)</b> | <b>R2 (<math>\Omega \text{ cm}^2</math>)</b> | <b>R3 (<math>\Omega \text{ cm}^2</math>)</b> |
|-------------------------|----------------------------------------------|----------------------------------------------|----------------------------------------------|
| SCF-SDC                 | 0.0213                                       | 0.0344                                       | 0.0997                                       |
| SCF-d-SDC               | 0.0072                                       | 0.0152                                       | 0.0665                                       |
| SCF-O <sub>2</sub> -SDC | 0.0091                                       | 0.0128                                       | 0.0607                                       |
